# Supplementary material
Source: publisher figshare collection journal article supplement (https://diabetesjournals.figshare.com/articles/dataset/_/24534934)
Supplement: Supplementary file 1 [file 1]

## Supplementary Materials

### Appendix A

#### Cohort-defining Medications

| Variable                  | ICD-9-CM codes                                                                                                                                                          | ICD-10-CM codes                |
|---------------------------|-------------------------------------------------------------------------------------------------------------------------------------------------------------------------|--------------------------------|
| <b>Diabetes Mellitus</b>  | 250.xx                                                                                                                                                                  | E08.xx, E10.xx, E11.xx, E13.xx |
| <b>AND</b>                | Generic names                                                                                                                                                           |                                |
| <b>On Insulin Therapy</b> | insulin, insulin glargine, insulin degludec, insulin detemir, insulin aspart, insulin lispro, insulin glulisine, insulin isophane, insulin regular, insulin NPH         |                                |
| <b>Sulfonylureas</b>      | acetohexamide, glimepiride, glisoxepide, metahexamide, gliclazide, gliquidone, glipizide, carbutamide, tolazamide, glibornuride, tolbutamide, glyburide, chlorpropamide |                                |
| <b>‘Metformin Only’*</b>  | Metformin + no other anti-diabetes class medication per RedBook drug class classification                                                                               |                                |

#### Outcomes

| Variable                   | ICD-9-CM codes                                                                                                                                                               | ICD-10-CM codes                                                                                                                                                                                                                                                          |
|----------------------------|------------------------------------------------------------------------------------------------------------------------------------------------------------------------------|--------------------------------------------------------------------------------------------------------------------------------------------------------------------------------------------------------------------------------------------------------------------------|
| <b>Severe Hypoglycemia</b> | 251.0, 251.1, 251.2, 270.3, 962.3<br><br><b>OR</b> 250.8x (and not 259.8, 272.7, 681.xx, 682.xx, 686.9x, 707.1x, 707.2x, 707.8, 707.9, 709.3, 730.0x, 730.1x, 730.2x, 731.8) | E08.641, E08.649, E09.641, E09.649, E10.641, E10.649, E11.641, E11.649, E13.641, E13.649, E15, E16.0, E16.1, E16.2, T38.3X1A, T38.3X1D, T38.3X1S, T38.3X2A, T38.3X2D, T38.3X2S, T38.3X3A, T38.3X3D, T38.3X3S, T38.3X4A, T38.3X4D, T38.3X4S, T38.3X5A, T38.3X5D, T38.3X5S |

#### Subgroups

| Variable                                  | Generic Names                                                                      |                                 |
|-------------------------------------------|------------------------------------------------------------------------------------|---------------------------------|
| <b>Long-acting Insulin Products</b>       | insulin glargine, insulin degludec, insulin detemir, insulin isophane, insulin NPH |                                 |
| <b>Short Acting Insulin Products</b>      | insulin aspart, insulin lispro, insulin glulisine, insulin regular                 |                                 |
| <b>Diabetes Type &amp; Severity</b>       | <b>ICD-9-CM codes</b>                                                              | <b>ICD-10-CM codes</b>          |
| <b>Type I diabetes w/o complications</b>  | 250.01, 250.03                                                                     | E10.65, E10.9                   |
| <b>Type I diabetes w/ complications</b>   | 250.x1, 250.x3 except for 250.01, 250.03                                           | E10.xx except for E10.65, E10.9 |
| <b>Type II diabetes w/o complications</b> | 250.00, 250.02                                                                     | E11.9, E11.65                   |
| <b>Type II diabetes w/ complications</b>  | 250.x0, 250.x2 except for 250.00, 250.02                                           | E11.xx except for E11.65, E11.9 |

## Appendix B. ICD-9 and ICD-10 codes for comorbidities

| Comorbidity                                                      | ICD-9                                                     | ICD-10                                                                                                                  |
|------------------------------------------------------------------|-----------------------------------------------------------|-------------------------------------------------------------------------------------------------------------------------|
| "DX: Diabetic nephropathy"                                       | 250.4x                                                    | E11.2x                                                                                                                  |
| "DX: Diabetic neuropathy"                                        | 250.6x                                                    | E11.4x                                                                                                                  |
| "DX: Diabetes retinopathy"                                       | 250.5x                                                    | E11.3x                                                                                                                  |
| "DX: Diabetes with peripheral circulatory disorders"             | "250.7", "250.70", "250.71", "250.72", "250.73", "443.81" | "E10.51", "E10.52", "E10.59", "E11.51", "E11.52", "E11.59", "E13.51", "E13.52", "E13.59"                                |
| DX: Diabetes overall (uncomplicated + complicated; Type I or II) | 250.xx                                                    | E10.xx, E11.xx, E13.xx                                                                                                  |
| "DX: Hypertension"                                               | 401.x, 402.x, 403.xx, 404.xx, 405.xx                      | "I10", "I110", "I119", "I120", "I129", "I130", "I1310", "I1311", "I132", "I150", "I151", "I152", "I158", "I159", "N262" |
| "DX: Hypercholesterolemia"                                       | "272.0", "272.2", "272.4"                                 | "E780", "E782", "E784", "E785"                                                                                          |

|              |                                                                                                                                                                                                                                                                                                                          |                                                                                                                                                                                                                                                                                                                                                                                                                                                                                                                                                                                                                                                                                                                                                                                                                                                                                                                                                                                                                                                                                                                                                                                                                                                                                                                                                                                                                                                                                                                           |
|--------------|--------------------------------------------------------------------------------------------------------------------------------------------------------------------------------------------------------------------------------------------------------------------------------------------------------------------------|---------------------------------------------------------------------------------------------------------------------------------------------------------------------------------------------------------------------------------------------------------------------------------------------------------------------------------------------------------------------------------------------------------------------------------------------------------------------------------------------------------------------------------------------------------------------------------------------------------------------------------------------------------------------------------------------------------------------------------------------------------------------------------------------------------------------------------------------------------------------------------------------------------------------------------------------------------------------------------------------------------------------------------------------------------------------------------------------------------------------------------------------------------------------------------------------------------------------------------------------------------------------------------------------------------------------------------------------------------------------------------------------------------------------------------------------------------------------------------------------------------------------------|
| "DX: Stroke" | <p>"430", "431", "433.0", "433.00", "433.01",<br/> "433.1", "433.10", "433.11", "433.2", "433.20",<br/> "433.21", "433.3", "433.30", "433.31", "433.8",<br/> "433.80", "433.81", "433.9", "433.90", "433.91",<br/> "434.0", "434.00", "434.01", "434.1", "434.10",<br/> "434.11", "434.9", "434.90", "434.91", "436"</p> | <p>"I60.00", "I60.01", "I60.02", "I60.10",<br/> "I60.11", "I60.12", "I60.2", "I60.30",<br/> "I60.31", "I60.32", "I60.4", "I60.50",<br/> "I60.51", "I60.52", "I60.6", "I60.7",<br/> "I60.8", "I60.9", "I61.0", "I61.1",<br/> "I61.2", "I61.3", "I61.4", "I61.5",<br/> "I61.6", "I61.8", "I61.9", "I63.00",<br/> "I63.011", "I63.012", "I63.019",<br/> "I63.02", "I63.031", "I63.032",<br/> "I63.039", "I63.09", "I63.10",<br/> "I63.111", "I63.112", "I63.119",<br/> "I63.12", "I63.131", "I63.132",<br/> "I63.139", "I63.19", "I63.20",<br/> "I63.211", "I63.212", "I63.219",<br/> "I63.22", "I63.231", "I63.232",<br/> "I63.239", "I63.29", "I63.30",<br/> "I63.311", "I63.312", "I63.319",<br/> "I63.321", "I63.322", "I63.329",<br/> "I63.331", "I63.332", "I63.339",<br/> "I63.341", "I63.342", "I63.349",<br/> "I63.39", "I63.40", "I63.411",<br/> "I63.412", "I63.419", "I63.421",<br/> "I63.422", "I63.429", "I63.431",<br/> "I63.432", "I63.439", "I63.441",<br/> "I63.442", "I63.449", "I63.49",<br/> "I63.50", "I63.511", "I63.512",<br/> "I63.519", "I63.521", "I63.522",<br/> "I63.529", "I63.531", "I63.532",<br/> "I63.539", "I63.541", "I63.542",<br/> "I63.549", "I63.59", "I63.6", "I63.8",<br/> "I63.9", "I65.01", "I65.02", "I65.03",<br/> "I65.09", "I65.1", "I65.21", "I65.22",<br/> "I65.23", "I65.29", "I65.8", "I65.9",<br/> "I66.01", "I66.02", "I66.03", "I66.09",<br/> "I66.11", "I66.12", "I66.13", "I66.19",<br/> "I66.21", "I66.22", "I66.23", "I66.29",<br/> "I66.3", "I66.8", "I66.9"</p> |
|--------------|--------------------------------------------------------------------------------------------------------------------------------------------------------------------------------------------------------------------------------------------------------------------------------------------------------------------------|---------------------------------------------------------------------------------------------------------------------------------------------------------------------------------------------------------------------------------------------------------------------------------------------------------------------------------------------------------------------------------------------------------------------------------------------------------------------------------------------------------------------------------------------------------------------------------------------------------------------------------------------------------------------------------------------------------------------------------------------------------------------------------------------------------------------------------------------------------------------------------------------------------------------------------------------------------------------------------------------------------------------------------------------------------------------------------------------------------------------------------------------------------------------------------------------------------------------------------------------------------------------------------------------------------------------------------------------------------------------------------------------------------------------------------------------------------------------------------------------------------------------------|

|                                                               |                                                                                                                                                                                                                                                                                                                                                                                                      |                                                                                                                                                                               |
|---------------------------------------------------------------|------------------------------------------------------------------------------------------------------------------------------------------------------------------------------------------------------------------------------------------------------------------------------------------------------------------------------------------------------------------------------------------------------|-------------------------------------------------------------------------------------------------------------------------------------------------------------------------------|
| "DX: Transient Ischemic Attack"                               | "435", "435.0", "435.1", "435.2", "435.3", "435.8", "435.9"                                                                                                                                                                                                                                                                                                                                          | "G45.0", "G45.1", "G45.2", "G45.8", "G45.9"                                                                                                                                   |
| "DX: Myocardial Infarction"                                   | "410.0", "410.00", "410.01", "410.02", "410.1", "410.10", "410.11", "410.12", "410.2", "410.20", "410.21", "410.22", "410.3", "410.30", "410.31", "410.32", "410.4", "410.40", "410.41", "410.42", "410.5", "410.50", "410.51", "410.52", "410.6", "410.60", "410.61", "410.62", "410.7", "410.70", "410.71", "410.72", "410.8", "410.80", "410.81", "410.82", "410.9", "410.90", "410.91", "410.92" | "I21.01", "I21.02", "I21.09", "I21.11", "I21.19", "I21.21", "I21.29", "I21.3", "I21.4", "I22.0", "I22.1", "I22.2", "I22.8", "I22.9"                                           |
| "DX: Old MI"                                                  | 412                                                                                                                                                                                                                                                                                                                                                                                                  | I252                                                                                                                                                                          |
| "DX: Heart Failure"                                           | "398.91", "402.01", "402.11", "402.91", "404.01", "404.03", "404.11", "404.13", "404.91", "404.93", "428", "428.0", "428.1", "428.2", "428.20", "428.21", "428.22", "428.23", "428.3", "428.30", "428.31", "428.32", "428.33", "428.4", "428.40", "428.41", "428.42", "428.43", "428.9"                                                                                                              | "I09.81", "I11.0", "I13.0", "I13.2", "I50.1", "I50.20", "I50.21", "I50.22", "I50.23", "I50.30", "I50.31", "I50.32", "I50.33", "I50.40", "I50.41", "I50.42", "I50.43", "I50.9" |
| "DX: Chronic Kidney Condition stage 1-2, stage 3 + dialysis " | "585.1", "585.2", "585.3", "585.4", "585.5", "585.6"                                                                                                                                                                                                                                                                                                                                                 | "N18.1", "N18.2", "N18.3", "N18.4", "N18.5", "N18.6"                                                                                                                          |

|                                             |                                                                                                                                                                                                                        |                                                                                                                                                                                                                                                                                                                                                                                                                                                                                                                                                         |
|---------------------------------------------|------------------------------------------------------------------------------------------------------------------------------------------------------------------------------------------------------------------------|---------------------------------------------------------------------------------------------------------------------------------------------------------------------------------------------------------------------------------------------------------------------------------------------------------------------------------------------------------------------------------------------------------------------------------------------------------------------------------------------------------------------------------------------------------|
| "DX: Renal insufficiency (non-CKD related)" | "582", "582.0", "582.1", "582.2", "582.4",<br>"582.8", "582.81", "582.89", "582.9", "583",<br>"583.0", "583.1", "583.2", "583.4", "583.6",<br>"583.7", "583.8", "583.81", "583.89", "583.9",<br>"586", "587", "585.9", | "N03.0", "N03.1", "N03.2", "N03.3",<br>"N03.4", "N03.5", "N03.6", "N03.7",<br>"N03.8", "N03.9", "N05.0", "N05.1",<br>"N05.2", "N05.3", "N05.4", "N05.5",<br>"N05.6", "N05.7", "N05.8", "N05.9",<br>"N06.0", "N06.1", "N06.2", "N06.3",<br>"N06.4", "N06.5", "N06.6", "N06.7",<br>"N06.8", "N06.9", "N07.0", "N07.1",<br>"N07.2", "N07.3", "N07.4", "N07.5",<br>"N07.6", "N07.7", "N07.8", "N07.9",<br>"N08", "N14.0", "N14.1", "N14.2",<br>"N14.3", "N14.4", "N15.0", "N15.8",<br>"N15.9", "N16", "N17.1", "N17.2",<br>"N18.9", "N19", "N26.1", "N26.9" |
| "DX: Stable angina"                         | "413.0", "413.1", "413.9"                                                                                                                                                                                              | "I20.1", "I20.8", "I20.9", "I25.111",<br>"I25.118", "I25.119", "I25.701",<br>"I25.708", "I25.709", "I25.711",<br>"I25.718", "I25.719", "I25.721",<br>"I25.728", "I25.729", "I25.731",<br>"I25.738", "I25.739", "I25.751",<br>"I25.758", "I25.759", "I25.761",<br>"I25.768", "I25.769", "I25.791",<br>"I25.798", "I25.799"                                                                                                                                                                                                                               |
| "DX: Unstable angina "                      | "411.0", "411.1", "411.8", "411.81", "411.89"                                                                                                                                                                          | "I20.0", "I24.0", "I24.1", "I24.8",<br>"I24.9", "I25.110", "I25.700",<br>"I25.710", "I25.720", "I25.730",<br>"I25.750", "I25.760", "I25.790"                                                                                                                                                                                                                                                                                                                                                                                                            |

|                                     |                                                                                                                                                                                       |                                                                                                                                                                                                                                                                                                                                                                                                                                                                                                           |
|-------------------------------------|---------------------------------------------------------------------------------------------------------------------------------------------------------------------------------------|-----------------------------------------------------------------------------------------------------------------------------------------------------------------------------------------------------------------------------------------------------------------------------------------------------------------------------------------------------------------------------------------------------------------------------------------------------------------------------------------------------------|
| "DX: Other Ischemic Heart Disease " | "414.0", "414.00", "414.01", "414.02", "414.03", "414.04", "414.05", "414.06", "414.07", "414.1", "414.10", "414.11", "414.12", "414.19", "414.2", "414.3", "414.4", "414.8", "414.9" | "I25.10", "I25.110", "I25.111", "I25.118", "I25.119", "I25.3", "I25.41", "I25.42", "I25.5", "I25.6", "I25.700", "I25.701", "I25.708", "I25.709", "I25.710", "I25.711", "I25.718", "I25.719", "I25.720", "I25.721", "I25.728", "I25.729", "I25.730", "I25.731", "I25.738", "I25.739", "I25.750", "I25.751", "I25.758", "I25.759", "I25.760", "I25.761", "I25.768", "I25.769", "I25.790", "I25.791", "I25.798", "I25.799", "I25.810", "I25.811", "I25.812", "I25.82", "I25.83", "I25.84", "I25.89", "I25.9" |
| "DX: PVD"                           | "440.20", "440.21", "440.22", "440.23", "440.24", "440.29", "440.30", "440.31", "440.32", "440.4", "443.9"                                                                            | I70.2xx-I70.7xx, I70.92, I73.9                                                                                                                                                                                                                                                                                                                                                                                                                                                                            |
| "DX: Atrial fibrillation"           | "427.3", "427.31", "427.32"                                                                                                                                                           | "I48.0", "I48.1", "I48.2", "I48.3", "I48.4", "I48.91", "I48.92"                                                                                                                                                                                                                                                                                                                                                                                                                                           |
| "DX: Other dysrhythmia"             | "427.0", "427.1", "427.2", "427.4", "427.41", "427.42", "427.6", "427.60", "427.61", "427.69", "427.8", "427.81", "427.89", "427.9"                                                   | "I46.2", "I46.8", "I46.9", "I47.0", "I47.1", "I47.2", "I47.9", "I48.0", "I48.1", "I48.2", "I48.3", "I48.4", "I48.91", "I48.92", "I49.01", "I49.02", "I49.1", "I49.2", "I49.3", "I49.40", "I49.49", "I49.5", "I49.8", "I49.9", "R00.1"                                                                                                                                                                                                                                                                     |

|                                                           |                                                                                                                                                                                                                  |                                                                                                                                                                                                                                                                                                  |
|-----------------------------------------------------------|------------------------------------------------------------------------------------------------------------------------------------------------------------------------------------------------------------------|--------------------------------------------------------------------------------------------------------------------------------------------------------------------------------------------------------------------------------------------------------------------------------------------------|
| "DX: Cardiac conduction disorder"                         | "426.0", "426.1", "426.10", "426.11", "426.12", "426.13", "426.2", "426.3", "426.4", "426.5", "426.50", "426.51", "426.52", "426.53", "426.54", "426.6", "426.7", "426.8", "426.81", "426.82", "426.89", "426.9" | "I44.0", "I44.1", "I44.2", "I44.30", "I44.39", "I44.4", "I44.5", "I44.60", "I44.69", "I44.7", "I45.0", "I45.10", "I45.19", "I45.2", "I45.3", "I45.4", "I45.5", "I45.6", "I45.81", "I45.89", "I45.9"                                                                                              |
| "DX: Other Cardio Vascular Diseases"                      | "432.0", "432.1", "432.9", "437.0", "437.1", "437.2", "437.3", "437.4", "437.5", "437.6", "437.7", "437.8", "437.9"                                                                                              | "G45.4", "G46.3", "G46.4", "G46.5", "G46.6", "G46.7", "G46.8", "I62.00", "I62.01", "I62.02", "I62.03", "I62.1", "I62.9", "I67.1", "I67.2", "I67.4", "I67.5", "I67.6", "I67.7", "I67.81", "I67.82", "I67.89", "I67.9", "I68.0", "I68.2", "I68.8", "G46.0", "G46.1", "G46.2", "I67.841", "I67.848" |
| "DX: Asthma"                                              | "493.0", "493.00", "493.01", "493.02", "493.1", "493.10", "493.11", "493.12", "493.2", "493.20", "493.21", "493.22", "493.8", "493.81", "493.82", "493.9", "493.90", "493.91", "493.92"                          | "J45.20", "J45.21", "J45.22", "J45.30", "J45.31", "J45.32", "J45.40", "J45.41", "J45.42", "J45.50", "J45.51", "J45.52", "J45.901", "J45.902", "J45.909", "J45.990", "J45.991", "J45.998"                                                                                                         |
| "DX: Chronic Obstructive Pulmonary Disease"               | "491.0", "491.1", "491.2", "491.20", "491.21", "491.22", "491.8", "491.9", "492.0", "492.8", "496"                                                                                                               | "J41.0", "J41.1", "J41.8", "J42", "J43.0", "J43.1", "J43.2", "J43.8", "J43.9", "J44.0", "J44.1", "J44.9"                                                                                                                                                                                         |
| "DX: Chronic Pulmonary Disease (includes bronchiectasis)" | 491.xx, 492.xx, 494.xx, 496.xx                                                                                                                                                                                   | J41-44, J47                                                                                                                                                                                                                                                                                      |

|                               |                                                                                                                                                                                                                                                                                                                                                                                                                         |                                                                                                                                                                                                                                                                                                                                                                                                                                                                             |
|-------------------------------|-------------------------------------------------------------------------------------------------------------------------------------------------------------------------------------------------------------------------------------------------------------------------------------------------------------------------------------------------------------------------------------------------------------------------|-----------------------------------------------------------------------------------------------------------------------------------------------------------------------------------------------------------------------------------------------------------------------------------------------------------------------------------------------------------------------------------------------------------------------------------------------------------------------------|
| "DX: Obstructive sleep apnea" | "327.23"                                                                                                                                                                                                                                                                                                                                                                                                                | "G47.33"                                                                                                                                                                                                                                                                                                                                                                                                                                                                    |
| "DX: Pneumonia"               | "480.0", "480.1", "480.2", "480.3", "480.8",<br>"480.9", "481", "482.0", "482.1", "482.2",<br>"482.3", "482.30", "482.31", "482.32", "482.39",<br>"482.4", "482.40", "482.41", "482.42", "482.49",<br>"482.8", "482.81", "482.82", "482.83", "482.84",<br>"482.89", "482.9", "483.0", "483.1", "483.8",<br>"484.1", "484.3", "484.5", "484.6", "484.7",<br>"484.8", "485", "486", "487.0", "507.0", "507.1",<br>"507.8" | A22.1", "A37.01", "A37.11",<br>"A37.81", "A37.91", "A48.1",<br>"B25.0", "B44.0", "B77.81", "J10.00",<br>"J10.01", "J10.08", "J11.00",<br>"J11.08", "J12.0", "J12.1", "J12.2",<br>"J12.3", "J12.81", "J12.89", "J12.9",<br>"J13", "J14", "J15.0", "J15.1",<br>"J15.20", "J15.211", "J15.212",<br>"J15.29", "J15.3", "J15.4", "J15.5",<br>"J15.6", "J15.7", "J15.8", "J15.9",<br>"J16.0", "J16.8", "J17", "J18.0",<br>"J18.1", "J18.8", "J18.9", "J69.0",<br>"J69.1", "J69.8" |
| "DX: Acute renal disease"     | "572.4", "580", "580.0", "580.4", "580.8",<br>"580.81", "580.89", "580.9", "584", "584.5",<br>"584.6", "584.7", "584.8", "584.9", "791.2",<br>"791.3"                                                                                                                                                                                                                                                                   | "K76.7", "N00.0", "N00.1", "N00.2",<br>"N00.3", "N00.4", "N00.5", "N00.6",<br>"N00.7", "N00.8", "N00.9", "N01.0",<br>"N01.1", "N01.2", "N01.3", "N01.4",<br>"N01.5", "N01.6", "N01.7", "N01.8",<br>"N01.9", "N08", "N17.0", "N17.1",<br>"N17.2", "N17.8", "N17.9", "R82.1",<br>"R82.3"                                                                                                                                                                                      |

|                                   |                                                                                                                                                                                                                                                                                       |                                                                                                                                                                                                                                                                                                                                                                                                                                                                                                                                                                                                                                                                                       |
|-----------------------------------|---------------------------------------------------------------------------------------------------------------------------------------------------------------------------------------------------------------------------------------------------------------------------------------|---------------------------------------------------------------------------------------------------------------------------------------------------------------------------------------------------------------------------------------------------------------------------------------------------------------------------------------------------------------------------------------------------------------------------------------------------------------------------------------------------------------------------------------------------------------------------------------------------------------------------------------------------------------------------------------|
| "DX: Chronic renal insufficiency" | "582", "582.0", "582.1", "582.2", "582.4",<br>"582.8", "582.81", "582.89", "582.9", "583",<br>"583.0", "583.1", "583.2", "583.4", "583.6",<br>"583.7", "583.8", "583.81", "583.89", "583.9",<br>"585", "585.1", "585.2", "585.3", "585.4",<br>"585.5", "585.6", "585.9", "586", "587" | "E092.1", "E092.2", "E092.9",<br>"M32.14", "M32.15", "M35.04",<br>"N03.0", "N03.1", "N03.2", "N03.3",<br>"N03.4", "N03.5", "N03.6", "N03.7",<br>"N03.8", "N03.9", "N05.0", "N05.1",<br>"N05.2", "N05.3", "N05.4", "N05.5",<br>"N05.6", "N05.7", "N05.8", "N05.9",<br>"N06.0", "N06.1", "N06.2", "N06.3",<br>"N06.4", "N06.5", "N06.6", "N06.7",<br>"N06.8", "N06.9", "N07.0", "N07.1",<br>"N07.2", "N07.3", "N07.4", "N07.5",<br>"N07.6", "N07.7", "N07.8", "N07.9",<br>"N08", "N14.0", "N14.1", "N14.2",<br>"N14.3", "N14.4", "N15.0", "N15.8",<br>"N15.9", "N16", "N17.1", "N17.2",<br>"N18.1", "N18.2", "N18.3", "N18.4",<br>"N18.5", "N18.6", "N18.9", "N19",<br>"N26.1", "N26.9" |
| "DX: Edema"                       | "782.3"                                                                                                                                                                                                                                                                               | "R60.0", "R60.1", "R60.9"                                                                                                                                                                                                                                                                                                                                                                                                                                                                                                                                                                                                                                                             |

|                     |                                                                                                                                                                                                                                                                                                                                                                                                                                                                                                                                                                                                                                                                                                                        |                                                                                                                                                                                                                                                                                                                                                                                                                                                                                                                                                                                                                                                                                                                                                                                                                                                                                                                                                                                                                    |
|---------------------|------------------------------------------------------------------------------------------------------------------------------------------------------------------------------------------------------------------------------------------------------------------------------------------------------------------------------------------------------------------------------------------------------------------------------------------------------------------------------------------------------------------------------------------------------------------------------------------------------------------------------------------------------------------------------------------------------------------------|--------------------------------------------------------------------------------------------------------------------------------------------------------------------------------------------------------------------------------------------------------------------------------------------------------------------------------------------------------------------------------------------------------------------------------------------------------------------------------------------------------------------------------------------------------------------------------------------------------------------------------------------------------------------------------------------------------------------------------------------------------------------------------------------------------------------------------------------------------------------------------------------------------------------------------------------------------------------------------------------------------------------|
| "DX: Liver disease" | <p> "070.0", "070.1", "070.2", "070.20", "070.21",<br/> "070.22", "070.23", "070.3", "070.30", "070.31",<br/> "070.32", "070.33", "070.4", "070.41", "070.42",<br/> "070.43", "070.44", "070.49", "070.5", "070.51",<br/> "070.52", "070.53", "070.54", "070.59", "070.6",<br/> "070.7", "070.70", "070.71", "070.9", "456.0",<br/> "456.1", "456.2", "456.20", "456.21", "570",<br/> "571.0", "571.1", "571.2", "571.3", "571.4",<br/> "571.40", "571.41", "571.42", "571.49", "571.5",<br/> "571.6", "571.8", "571.9", "572.0", "572.1",<br/> "572.2", "572.3", "572.4", "572.8", "573.0",<br/> "573.1", "573.2", "573.3", "573.4", "573.5",<br/> "573.8", "573.9", , "782.4", "789.5", "789.51",<br/> "789.59" </p> | <p> "B15.0", "B15.9", "B16.0", "B16.1",<br/> "B16.2", "B16.9", "B17.0", "B17.10",<br/> "B17.11", "B17.2", "B17.8", "B17.9",<br/> "B18.0", "B18.1", "B18.2", "B18.8",<br/> "B18.9", "B19.0", "B19.10",<br/> "B19.11", "B19.20", "B19.21",<br/> "B19.9", "B25.1", "I85.00", "I85.01",<br/> "I85.10", "I85.11", "K70.0", "K70.10",<br/> "K70.11", "K70.2", "K70.30",<br/> "K70.31", "K70.40", "K70.41",<br/> "K70.9", "K71.0", "K71.10", "K71.11",<br/> "K71.2", "K71.3", "K71.4", "K71.50",<br/> "K71.51", "K71.6", "K71.7", "K71.8",<br/> "K71.9", "K72.00", "K72.01",<br/> "K72.10", "K72.11", "K72.90",<br/> "K72.91", "K73.0", "K73.1", "K73.2",<br/> "K73.8", "K73.9", "K74.0", "K74.1",<br/> "K74.2", "K74.3", "K74.4", "K74.5",<br/> "K74.60", "K74.69", "K75.0", "K75.1",<br/> "K75.2", "K75.3", "K75.4", "K75.81",<br/> "K75.89", "K75.9", "K76.0", "K76.1",<br/> "K76.2", "K76.3", "K76.4", "K76.5",<br/> "K76.6", "K76.7", "K76.81", "K76.89",<br/> "K76.9", "K77", , , "R17", "R18.0",<br/> "R18.8" </p> |
|---------------------|------------------------------------------------------------------------------------------------------------------------------------------------------------------------------------------------------------------------------------------------------------------------------------------------------------------------------------------------------------------------------------------------------------------------------------------------------------------------------------------------------------------------------------------------------------------------------------------------------------------------------------------------------------------------------------------------------------------------|--------------------------------------------------------------------------------------------------------------------------------------------------------------------------------------------------------------------------------------------------------------------------------------------------------------------------------------------------------------------------------------------------------------------------------------------------------------------------------------------------------------------------------------------------------------------------------------------------------------------------------------------------------------------------------------------------------------------------------------------------------------------------------------------------------------------------------------------------------------------------------------------------------------------------------------------------------------------------------------------------------------------|

|                       |                                                                                                                                                                                                                                                   |                                                                                                                                                                                                                                                                                                                                                                                         |
|-----------------------|---------------------------------------------------------------------------------------------------------------------------------------------------------------------------------------------------------------------------------------------------|-----------------------------------------------------------------------------------------------------------------------------------------------------------------------------------------------------------------------------------------------------------------------------------------------------------------------------------------------------------------------------------------|
| "DX: Hypothyroidism"  | "243", "244.0", "244.1", "244.2", "244.3",<br>"244.8", "244.9"                                                                                                                                                                                    | "E00.0", "E00.1", "E00.2", "E00.9",<br>"E01.8", "E02", "E03.0", "E03.1",<br>"E03.2", "E03.3", "E03.8", "E03.9",<br>"E89.0"                                                                                                                                                                                                                                                              |
| "DX: Hyperthyroidism" | "242.1", "242.10", "242.11", "242.3", "242.30",<br>"242.31", "242.9", "242.90", "242.91"                                                                                                                                                          | "E051.0", "E051.1", "E052.0",<br>"E052.1", "E059.0", "E059.1"                                                                                                                                                                                                                                                                                                                           |
| "DX: Depression"      | "293.83", "296.2", "296.20", "296.21", "296.22",<br>"296.23", "296.24", "296.25", "296.26", "296.3",<br>"296.30", "296.31", "296.32", "296.33",<br>"296.34", "296.35", "296.36", "298.0", "300.4",<br>"309.0", "309.1", "309.28", "311", "296.90" | "F06.30", "F06.31", "F06.32",<br>"F06.33", "F06.34", "F32.3", "F32.9",<br>"F33.3", "F34.1", "F43.21", "F43.23"                                                                                                                                                                                                                                                                          |
| "DX: Anxiety"         | "293.84", "300.0", "300.00", "300.01", "300.02",<br>"300.09", "300.2", "300.20", "300.21", "300.22",<br>"300.23", "300.29", "300.3", "308.0", "309.24",<br>"309.81"                                                                               | "F06.4", "F40.00", "F40.01",<br>"F40.02", "F40.10", "F40.11",<br>"F40.210", "F40.218", "F40.220",<br>"F40.228", "F40.230", "F40.231",<br>"F40.232", "F40.233", "F40.240",<br>"F40.241", "F40.242", "F40.243",<br>"F40.248", "F40.290", "F40.291",<br>"F40.298", "F40.8", "F40.9", "F41.0",<br>"F41.1", "F41.3", "F41.8", "F41.9",<br>"F43.0", "F43.10", "F43.11",<br>"F43.12", "F43.22" |

|                      |                                                                                                                                                                                                                                                                                                                                                                                                                                                                                                                        |                                                                                                                                                                                                                                                                                                                                                                                                                                                                                                                                                                          |
|----------------------|------------------------------------------------------------------------------------------------------------------------------------------------------------------------------------------------------------------------------------------------------------------------------------------------------------------------------------------------------------------------------------------------------------------------------------------------------------------------------------------------------------------------|--------------------------------------------------------------------------------------------------------------------------------------------------------------------------------------------------------------------------------------------------------------------------------------------------------------------------------------------------------------------------------------------------------------------------------------------------------------------------------------------------------------------------------------------------------------------------|
| "DX: sleep disorder" | <p>"307.4", "307.40", "307.41", "307.42", "307.43",<br/> "307.44", "307.45", "307.46", "307.47",<br/> "307.48", "307.49", "327.0", "327.00", "327.01",<br/> "327.02", "327.09", "327.2", "327.20", "327.21",<br/> "327.22", "327.23", "327.24", "327.25",<br/> "327.26", "327.27", "327.29", "347", "347.0",<br/> "347.00", "347.01", "347.1", "347.10", "347.11",<br/> "780.5", "780.50", "780.51", "780.52", "780.53",<br/> "780.54", "780.55", "780.56", "780.57",<br/> "780.58", "780.59",</p>                     | <p>"F51.01", "F51.02", "F51.03",<br/> "F51.04", "F51.05", "F51.09",<br/> "F51.11", "F51.12", "F51.19",<br/> "F51.3", "F51.4", "F51.5", "F51.8",<br/> "F51.9", "G47.01", "G47.09",<br/> "G47.411", "G47.419", "G47.421",<br/> "G47.429"</p>                                                                                                                                                                                                                                                                                                                               |
| "DX: Dementia"       | <p>"290.0", "290.1", "290.10", "290.11", "290.12",<br/> "290.13", "290.2", "290.20", "290.21", "290.3",<br/> "290.4", "290.40", "290.41", "290.42", "290.43",<br/> "290.8", "290.9", "294.0", "294.1", "294.10",<br/> "294.11", "294.2", "294.20", "294.21", "294.8",<br/> "294.9", "330.0", "330.1", "330.2", "330.3",<br/> "330.8", "330.9", "331.0", "331.1", "331.11",<br/> "331.19", "331.2", "331.3", "331.4", "331.5",<br/> "331.6", "331.7", "331.8", "331.81", "331.82",<br/> "331.83", "331.89", "331.9"</p> | <p>"E750.0", "E750.1", "E750.2",<br/> "E750.9", "E751.0", "E751.1",<br/> "E751.9", "E752.3", "E752.5",<br/> "E752.9", "E754", "F01.50",<br/> "F01.51", "F02.80", "F02.81",<br/> "F03.90", "F03.91", "F04", "F05",<br/> "F06.0", "F06.1", "F06.8", "F84.2",<br/> "G13.2", "G13.8", "G30.0", "G30.1",<br/> "G30.8", "G30.9", "G31.01",<br/> "G31.09", "G31.1", "G31.2",<br/> "G31.81", "G31.82", "G31.83",<br/> "G31.84", "G31.85", "G31.89",<br/> "G31.9", "G91.0", "G91.1", "G91.2",<br/> "G91.3", "G91.4", "G91.8", "G91.9",<br/> "G93.7", "G93.89", "G93.9", "G94"</p> |

|                 |                                                                                                                                                                                                                                                                                                                                                                                                                                                                                                                                                                                                                                                                                                                                                                                                                                                                                                                                                                                                                                                                                                   |                                                                                                                                                                                                                                                                                            |
|-----------------|---------------------------------------------------------------------------------------------------------------------------------------------------------------------------------------------------------------------------------------------------------------------------------------------------------------------------------------------------------------------------------------------------------------------------------------------------------------------------------------------------------------------------------------------------------------------------------------------------------------------------------------------------------------------------------------------------------------------------------------------------------------------------------------------------------------------------------------------------------------------------------------------------------------------------------------------------------------------------------------------------------------------------------------------------------------------------------------------------|--------------------------------------------------------------------------------------------------------------------------------------------------------------------------------------------------------------------------------------------------------------------------------------------|
| "DX: Psychosis" | <p> "290.8", "290.9", "295.0", "295.00", "295.01",<br/> "295.02", "295.03", "295.04", "295.05", "295.1",<br/> "295.10", "295.11", "295.12", "295.13",<br/> "295.14", "295.15", "295.2", "295.20", "295.21",<br/> "295.22", "295.23", "295.24", "295.25", "295.3",<br/> "295.30", "295.31", "295.32", "295.33",<br/> "295.34", "295.35", "295.4", "295.40", "295.41",<br/> "295.42", "295.43", "295.44", "295.45", "295.5",<br/> "295.50", "295.51", "295.52", "295.53",<br/> "295.54", "295.55", "295.6", "295.60", "295.61",<br/> "295.62", "295.63", "295.64", "295.65", "295.7",<br/> "295.70", "295.71", "295.72", "295.73",<br/> "295.74", "295.75", "295.8", "295.80", "295.81",<br/> "295.82", "295.83", "295.84", "295.85", "295.9",<br/> "295.90", "295.91", "295.92", "295.93",<br/> "295.94", "295.95", "297.0", "297.1", "297.2",<br/> "297.3", "297.8", "297.9", "298.0", "298.1",<br/> "298.2", "298.3", "298.4", "298.8", "298.9",<br/> "299.0", "299.00", "299.01", "299.1", "299.10",<br/> "299.11", "299.8", "299.80", "299.81", "299.9",<br/> "299.90", "299.91", "780.1" </p> | <p> "F20.0", "F20.1", "F20.2", "F20.3",<br/> "F20.5", "F20.81", "F20.89", "F20.9",<br/> "F22", "F23", "F24", "F25.0", "F25.1",<br/> "F25.8", "F25.9", "F28", "F29",<br/> "F32.3", "F33.3", "F44.89", "F84.0",<br/> "F84.3", "F84.5", "F84.8", "F84.9",<br/> "R44.0", "R44.2", "R44.3" </p> |
|-----------------|---------------------------------------------------------------------------------------------------------------------------------------------------------------------------------------------------------------------------------------------------------------------------------------------------------------------------------------------------------------------------------------------------------------------------------------------------------------------------------------------------------------------------------------------------------------------------------------------------------------------------------------------------------------------------------------------------------------------------------------------------------------------------------------------------------------------------------------------------------------------------------------------------------------------------------------------------------------------------------------------------------------------------------------------------------------------------------------------------|--------------------------------------------------------------------------------------------------------------------------------------------------------------------------------------------------------------------------------------------------------------------------------------------|

|               |                                                                                                                                                                                                                                                                                                                                                                                                                                   |                                                                                                                                                                                                                                                                                                                                                                                |
|---------------|-----------------------------------------------------------------------------------------------------------------------------------------------------------------------------------------------------------------------------------------------------------------------------------------------------------------------------------------------------------------------------------------------------------------------------------|--------------------------------------------------------------------------------------------------------------------------------------------------------------------------------------------------------------------------------------------------------------------------------------------------------------------------------------------------------------------------------|
| "DX: Obesity" | <p>"278.0", "278.00", "278.01", "278.03", "539",<br/> "539.0", "539.01", "539.09", "539.8", "539.81",<br/> "539.89", "649.1", "649.10", "649.11", "649.12",<br/> "649.13", "649.14", "649.2", "649.20", "649.21",<br/> "649.22", "649.23", "649.24", "V85.30",<br/> "V85.31", "V85.32", "V85.33", "V85.34",<br/> "V85.35", "V85.36", "V85.37", "V85.38",<br/> "V85.39", "V85.41", "V85.42", "V85.43",<br/> "V85.44", "V85.45"</p> | <p>"E660.9", "E661", "E668", "E669",<br/> "O99.210", "O99.211", "O99.212",<br/> "O99.213", "O99.214", "O99.215",<br/> "O99.840", "O99.841", "O99.842",<br/> "O99.843", "O99.844", "O99.845",<br/> "Z68.30", "Z68.31", "Z68.32",<br/> "Z68.33", "Z68.34", "Z68.35",<br/> "Z68.36", "Z68.37", "Z68.38",<br/> "Z68.39", "Z68.41", "Z68.42",<br/> "Z68.43", "Z68.44", "Z68.45"</p> |
| "DX: smoking" | <p>"305.1", "649.0", "649.00", "649.01", "649.02",<br/> "649.03", "649.04", "989.84", "V15.82"</p>                                                                                                                                                                                                                                                                                                                                | <p>"F17.200", "F17.201", "F17.210",<br/> "F17.211", "F17.220", "F17.221",<br/> "F17.290", "F17.291", "O99.330",<br/> "O99.331", "O99.332", "O99.333",<br/> "O99.334", "O99.335", "T65.211A",<br/> "T65.212A", "T65.213A",<br/> "T65.214A", "T65.221A",<br/> "T65.222A", "T65.223A",<br/> "T65.224A", "T65.291A",<br/> "T65.292A", "T65.293A",<br/> "T65.294A", "Z87.891"</p>   |

|                   |                                                                                                                                                                                                                                                                                                                                                                        |                                                                                                                                                                                                                                                                                                                                                                                                                                                                                                                                                                                                                                                                                                                                                                           |
|-------------------|------------------------------------------------------------------------------------------------------------------------------------------------------------------------------------------------------------------------------------------------------------------------------------------------------------------------------------------------------------------------|---------------------------------------------------------------------------------------------------------------------------------------------------------------------------------------------------------------------------------------------------------------------------------------------------------------------------------------------------------------------------------------------------------------------------------------------------------------------------------------------------------------------------------------------------------------------------------------------------------------------------------------------------------------------------------------------------------------------------------------------------------------------------|
| "DX: alcohol use" | <p>"291.0", "291.1", "291.2", "291.3", "291.4",<br/> "291.5", "291.8", "291.81", "291.82", "291.89",<br/> "291.9", "303.0", "303.00", "303.01", "303.02",<br/> "303.03", "303.9", "303.90", "303.91", "303.92",<br/> "303.93", "305.0", "305.00", "305.01", "305.02",<br/> "305.03", "357.5", "425.5", "571.0", "571.1",<br/> "571.2", "571.3", "E860.0", "V11.3",</p> | <p>"F10.10", "F10.120", "F10.121",<br/> "F10.129", "F10.14", "F10.150",<br/> "F10.151", "F10.159", "F10.180",<br/> "F10.181", "F10.182", "F10.188",<br/> "F10.19", "F10.20", "F10.21",<br/> "F10.220", "F10.221", "F10.229",<br/> "F10.230", "F10.231", "F10.232",<br/> "F10.239", "F10.24", "F10.250",<br/> "F10.251", "F10.259", "F10.26",<br/> "F10.27", "F10.280", "F10.281",<br/> "F10.282", "F10.288", "F10.29",<br/> "F10.920", "F10.921", "F10.929",<br/> "F10.94", "F10.950", "F10.951",<br/> "F10.959", "F10.96", "F10.97",<br/> "F10.980", "F10.981", "F10.982",<br/> "F10.988", "F10.99", "G62.1",<br/> "I42.6", "K70.0", "K70.10", "K70.11",<br/> "K70.2", "K70.30", "K70.31",<br/> "K70.40", "K70.41", "K70.9",<br/> "T51.0X1A", "T51.0X1D", "T51.0X1S"</p> |
|-------------------|------------------------------------------------------------------------------------------------------------------------------------------------------------------------------------------------------------------------------------------------------------------------------------------------------------------------------------------------------------------------|---------------------------------------------------------------------------------------------------------------------------------------------------------------------------------------------------------------------------------------------------------------------------------------------------------------------------------------------------------------------------------------------------------------------------------------------------------------------------------------------------------------------------------------------------------------------------------------------------------------------------------------------------------------------------------------------------------------------------------------------------------------------------|

"DX: drug abuse"

"292.0", "292.1", "292.11", "292.12", "292.2",  
"292.8", "292.81", "292.82", "292.83", "292.84",  
"292.85", "292.89", "292.9", "304.0", "304.00",  
"304.01", "304.02", "304.03", "304.1", "304.10",  
"304.11", "304.12", "304.13", "304.2", "304.20",  
"304.21", "304.22", "304.23", "304.3", "304.30",  
"304.31", "304.32", "304.33", "304.4", "304.40",  
"304.41", "304.42", "304.43", "304.5", "304.50",  
"304.51", "304.52", "304.53", "304.6", "304.60",  
"304.61", "304.62", "304.63", "304.7", "304.70",  
"304.71", "304.72", "304.73", "304.8", "304.80",  
"304.81", "304.82", "304.83", "304.9", "304.90",  
"304.91", "304.92", "304.93", "305.2", "305.20",  
"305.21", "305.22", "305.23", "305.3", "305.30",  
"305.31", "305.32", "305.33", "305.4", "305.40",  
"305.41", "305.42", "305.43", "305.5", "305.50",  
"305.51", "305.52", "305.53", "305.6", "305.60",  
"305.61", "305.62", "305.63", "305.7", "305.70",  
"305.71", "305.72", "305.73", "305.8", "305.80",  
"305.81", "305.82", "305.83", "305.9", "305.90",  
"305.91", "305.92", "305.93", "648.3", "648.30",  
"648.31", "648.32", "648.33", "648.34", "965.0",  
"965.00", "965.01", "965.02", "965.09", "967",  
"967.0", "967.1", "967.2", "967.3", "967.4",  
"967.5", "967.6", "967.8", "967.9", "969.4",  
"969.5", "969.6", "969.72", "969.73", "969.79",  
"970.81"

"F11.10", "F11.120", "F11.121",  
"F11.122", "F11.129", "F11.14",  
"F11.150", "F11.151", "F11.159",  
"F11.181", "F11.182", "F11.188",  
"F11.19", "F11.20", "F11.21",  
"F11.220", "F11.221", "F11.222",  
"F11.229", "F11.23", "F11.24",  
"F11.250", "F11.251", "F11.259",  
"F11.281", "F11.282", "F11.288",  
"F11.29", "F11.90", "F11.920",  
"F11.921", "F11.922", "F11.929",  
"F11.93", "F11.94", "F11.950",  
"F11.951", "F11.959", "F11.981",  
"F11.982", "F11.988", "F11.99",  
"F12.10", "F12.120", "F12.121",  
"F12.122", "F12.129", "F12.150",  
"F12.151", "F12.159", "F12.180",  
"F12.188", "F12.19", "F12.20",  
"F12.21", "F12.220", "F12.221",  
"F12.222", "F12.229", "F12.250",  
"F12.251", "F12.259", "F12.280",  
"F12.288", "F12.29", "F12.90",  
"F12.920", "F12.921", "F12.922",  
"F12.929", "F12.950", "F12.951",  
"F12.959", "F12.980", "F12.988",  
"F12.99", "F13.10", "F13.120",  
"F13.121", "F13.129", "F13.14",  
"F13.150", "F13.151", "F13.159",  
"F13.180", "F13.181", "F13.182",  
"F13.188", "F13.19", "F13.20",  
"F13.21", "F13.220", "F13.221",  
"F13.229", "F13.230", "F13.231",  
"F13.232", "F13.239", "F13.24",  
"F13.250", "F13.251", "F13.259",  
"F13.26", "F13.27", "F13.280",  
"F13.281", "F13.282", "F13.288",  
"F13.29", "F13.90", "F13.920",  
"F13.921", "F13.929", "F13.930",  
"F13.931", "F13.932", "F13.939",  
"F13.94", "F13.950", "F13.951",  
"F13.959", "F13.96", "F13.97",  
"F13.980", "F13.981", "F13.982",  
"F13.988", "F13.99", "F14.10",  
"F14.120", "F14.121", "F14.122",  
"F14.129", "F14.14", "F14.150",  
"F14.151", "F14.159", "F14.180",  
"F14.181", "F14.182", "F14.188",  
"F14.19", "F14.20", "F14.21",  
"F14.220", "F14.221", "F14.222",  
"F14.229", "F14.23", "F14.24",

|                                                            |                                                                                                                                                                                           |                                                                                                                                                                                                 |
|------------------------------------------------------------|-------------------------------------------------------------------------------------------------------------------------------------------------------------------------------------------|-------------------------------------------------------------------------------------------------------------------------------------------------------------------------------------------------|
| "DX: Congenital Anomalies of the Heart and Great Arteries" | 745.x, 746.x, 747.0, 747.1x, 747.2x                                                                                                                                                       | Q20.x, Q21.x, Q22.x, Q23.x, Q24.x, Q25.x                                                                                                                                                        |
| "DX: Cardiomyopathy"                                       | 422.x, 425.x                                                                                                                                                                              | I40.x, I42.x                                                                                                                                                                                    |
| "DX: Ventricular arrhythmia"                               | 427.1x, 427.4x, 427.5x                                                                                                                                                                    | I47.2x, I49.0x, I46.x                                                                                                                                                                           |
| "DX: Disorders of Mineral & electrolyte imbalance "        | 275.*, 276.*                                                                                                                                                                              | E83.*, E86.*, E87.*                                                                                                                                                                             |
| "DX: Diarrhea"                                             | "579.4", "787.91", "564.5", "564.1", "008.45"                                                                                                                                             | "K903", "K197", "K591", "K58", "A047"                                                                                                                                                           |
| "DX: hyperparathyroidism"                                  | "252.0"                                                                                                                                                                                   | "E210", "E211", "E212", "E213"                                                                                                                                                                  |
| "DX: Angioneurotic edema"                                  | "995.1"                                                                                                                                                                                   | "T78.3"                                                                                                                                                                                         |
| "DX: Diseases and dysfunctions of GI/GU"                   | "455", "456.0", "456.20", "530.1", "530.7", "530.82", "531", "532", "533", "534", "535", "537.83", "562", "568.81", "569.3", "598.5", "578", "593.81", "599.7", "623.8", "626.2", "626.6" | "K64", "I850.1", "I851.1", "K20", "K22.6", "K25", "K26", "K27", "K28", "K29", "K31.811", "K57", "K66.1", "K62.5", "K55.21", "K92.0", "K92.1", "K922", "K31", "N28.0", "N89.8", "N92.0", "N92.1" |
| "DX: food allergy"                                         | "692.5", "693.1", "995.6", "995.7", "V150"                                                                                                                                                | "L25.4", "L27.2", "T78.0", "T78.1", "Z19.01"                                                                                                                                                    |
| "DX: "Drug Allergy"                                        | "995.27", "692.3", "693.0", "V14"                                                                                                                                                         | "L251", "L27.0", "L27.1", "Z88"                                                                                                                                                                 |

|                   |                                                                                                                                                             |                                                                                                                                                                                                                                                                                                                                                    |
|-------------------|-------------------------------------------------------------------------------------------------------------------------------------------------------------|----------------------------------------------------------------------------------------------------------------------------------------------------------------------------------------------------------------------------------------------------------------------------------------------------------------------------------------------------|
| "DX: Glaucoma"    | "36502"                                                                                                                                                     | "H409"                                                                                                                                                                                                                                                                                                                                             |
| "DX: Myocarditis" | "074.23", "093.82", "391.2", "398.0", "422.0",<br>"422.90", "422.91", "422.92", "422.93",<br>"422.99", "429.0" "                                            | "B33.22", "A52.06", "I01.2", "I09.0",<br>"I40.xx", "I41", "I51.4", "                                                                                                                                                                                                                                                                               |
| "DX: Neutropenia" | 2880, "28801", "28802", "28803", "28804",<br>"28809", "2881"                                                                                                | "D709", "D700", "D704", "D701",<br>"D702", "D703", "D708", "D71"                                                                                                                                                                                                                                                                                   |
| "DX: Cancer"      | '14','15','16','17','18','19','20','23'                                                                                                                     | 'C','D1','D2','D3','D4'                                                                                                                                                                                                                                                                                                                            |
| "DX: Epilepsy"    | "34500", "34501", "34510", "34511", "3452",<br>"3453", "34540", "34542", "34550", "34552",<br>"34560", "34561", "34570", "34580", "34581",<br>"34590 34591" | "G40A01", "G40A09", "G40A11",<br>"G40A19", "G40309", "G40311",<br>"G40401", "G40409", "G40411",<br>"G40419", "G40301", "G40201",<br>"G40209", "G40211", "G40219",<br>"G40101", "G40109", "G40111",<br>"G40119", "G40821", "G40822",<br>"G40823", "G40824",<br>"G40501", "G40509", "G40802",<br>"G40804", "G40901", "G40909",<br>"G40911", "G40919" |
| "DX: HIV"         | 042                                                                                                                                                         | B20*, B22*, B23*, B24*, R75*, Z21*                                                                                                                                                                                                                                                                                                                 |

|               |             |             |
|---------------|-------------|-------------|
| "DX: Anemias" | 280* - 285* | D50* - D64* |
|---------------|-------------|-------------|

"DX: Any Mental Disorder"

290-319

"F0150", "F0151", "F0280", "F0281",  
"F0390", "F0391", "F04", "F05",  
"F060", "F061", "F062", "F0630",  
"F064", "F068", "F10159", "F10180",  
"F10181", "F10182", "F10188",  
"F10231", "F10239", "F10259",  
"F1027", "F10280", "F10281",  
"F10282", "F10288", "F10929",  
"F10950", "F10951", "F10959",  
"F1096", "F10980", "F10982",  
"F1099", "F11159", "F11181",  
"F11182", "F11188", "F11222",  
"F11259", "F11281", "F11282",  
"F11288", "F11922", "F11959",  
"F11981", "F11982", "F11988",  
"F12122", "F12159", "F12180",  
"F12188", "F12222", "F12259",  
"F12280", "F12288", "F12922M  
F12959", "F12980", "F12988",  
"F13159", "F13180", "F13181",  
"F13182", "F13188", "F13259",  
"F13280", "F13281", "F13282",  
"F13288", "F13959", "F13980",  
"F13981", "F13982", "F13988",  
"F14122", "F14159", "F14181",  
"F14182", "F14188", "F14222",  
"F14259", "F14280", "F14281",  
"F14282", "F14922", "F14959",  
"F14980", "F14981", "F14982",  
"F14988", "F15122", "F15159",  
"F15180", "F15181", "F15182",  
"F15188", "F15222", "F15259",  
"F15280", "F15281", "F15282",  
"F15288", "F15922", "F15959",  
"F15980", "F15981", "F15982",  
"F15988", "F16122", "F16159",  
"F16180", "F16183", "F16188",  
"F16259", "F16280", "F16283",  
"F16288", "F16959", "F16980",  
"F16983", "F16988", "F17208",  
"F17218", "F17228", "F17298",  
"F18159", "F18180", "F18188",  
"F18259", "F18280", "F18288",  
"F18959", "F18980", "F18988",  
"F19122", "F19159", "F19180",  
"F19181", "F19182", "F19188",  
"F19222", "F19259", "F19280",  
"F19281", "F19282", "F19288",  
"F19922", "F19939", "F1994",  
"F19950", "F19959", "F19980",  
"F19981", "F19982", "F19988",

|                                   |                                                                                                                                                                                                                                                                                                                                                                                          |                                                                                                                                                                                                                                                                                              |
|-----------------------------------|------------------------------------------------------------------------------------------------------------------------------------------------------------------------------------------------------------------------------------------------------------------------------------------------------------------------------------------------------------------------------------------|----------------------------------------------------------------------------------------------------------------------------------------------------------------------------------------------------------------------------------------------------------------------------------------------|
| "DX: Bipolar Disorder"            | "29600", "29601", "29602", "29603", "29604", "29605", "29606", "29610", "29611", "29612", "29613", "29614", "29615", "29616", "29640", "29641", "29642", "29643", "29644", "29645", "29646", "29650", "29651", "29652", "29653", "29654", "29655", "29656", "29660", "29661", "29662", "29663", "29664", "29665", "29666", "2967", "29680", "29681", "29682", "29689"                    | "F308", "F3010", "F3011", "F3012", "F3013", "F302", "F303", "F304", "F308", "F3110", "F3111", "F3112", "F3113", "F312", "F313", "F3131", "F3132", "F314", "F315", "F316", "F3161", "F3162", "F3163", "F3164", "F3173", "F3174", "F3175", "F3176", "F3177", "F3178", "F3181", "F319", "F3289" |
| "DX: Dyskinesia"                  | "33385"                                                                                                                                                                                                                                                                                                                                                                                  | "G2401"                                                                                                                                                                                                                                                                                      |
| "DX: Diverticulosis of Intestine" | "56200", "56201", "56202", "56203", "56210", "56211", "56212", "56213"                                                                                                                                                                                                                                                                                                                   | "K5710", "K5712", "K5711", "K3713", "K5730", "K5732", "K5731", "K5733"                                                                                                                                                                                                                       |
| "DX: Pancreatitis"                | "5770", "5771"                                                                                                                                                                                                                                                                                                                                                                           | "K8590", "K8591", "K8592", "K861"                                                                                                                                                                                                                                                            |
| "DX: Osteoarthritis"              | "71500", "71504", "71509", "71510", "71511", "71512", "71513", "71514", "71515", "71516", "71517", "71518", "71518", "71520", "71521", "71522", "71523", "71524", "71525", "71526", "71527", "71528", "71530", "71531", "71532", "71533", "71534", "71535", "71536", "71537", "71538", "71580", "71589", "71590", "71591", "71592", "71593", "71594", "71595", "71596", "71597", "71598" | "M150", "M151", "M152", "M153", "M158", "M159", "M1610", "M167", "M169", "M1710", "M175", "M179", "M189", "M19019", "M19029", "M19039", "M19049", "M19079", "M19093", "M19219", "M19229", "M19239", "M19249", "M19279", "M1990", "M1991", "M1993"                                            |

|                     |                                                                                                                                                                                                                                |                                                                                                                                                                                                                                                                                                                                                                                                                                                                                                                    |
|---------------------|--------------------------------------------------------------------------------------------------------------------------------------------------------------------------------------------------------------------------------|--------------------------------------------------------------------------------------------------------------------------------------------------------------------------------------------------------------------------------------------------------------------------------------------------------------------------------------------------------------------------------------------------------------------------------------------------------------------------------------------------------------------|
| "DX: Disc Disorder" | "7220", "72210", "72211", "7222", "72230",<br>"72231", "72232", "72239", "7224", "72251",<br>"72252", "7226", "72270", "72271", "72272",<br>"72273", "72280", "72281", "72282", "72283",<br>"72290", "72291", "72292", "72293" | "M4640", "M4645", "M4647",<br>"M5000", "M5020", "M5124",<br>"M5125", "M5126", "M5030",<br>"M5080", "M5090", "M5104",<br>"M5105", "M5106", "M5127",<br>"M5134", "M5135", "M5136",<br>"M5137", "M5144", "M5145",<br>"M5146", "M5147", "M5184",<br>"M5185", "M5186", "M5197",<br>"M519", "M961"                                                                                                                                                                                                                       |
| "DX: Hip Fracture"  | "82000", "82001", "82002", "82003", "82009",<br>"82010", "82011", "82012", "82013", "82019",<br>"82020", "82021", "82022", "82030", "82031",<br>"82032", "8208", "8209"                                                        | "S72009A", "S72009B", "S72009C",<br>"S72019A", "S72019B", "S72019C",<br>"S72023A", "S7223B", "S72023C",<br>"S72026A", "S72026B", "S72026C",<br>"S72033A", "S72033B", "S72033C",<br>"S72036A", "S72036B", "S72036C",<br>"S72043A", "S72043B", "S72043C",<br>"S72046A", "S72046B", "S72046C",<br>"S72099A", "S72099B", "S72099C",<br>"S72109A", "S72109B", "S72109C",<br>"S72143A", "S72143B", "S72143C",<br>"S72146A", "S72146B", "S72146C",<br>"S7223XA", "S7223XB", "S7223XC",<br>"S7226XA", "S7223XB", "S7223XC" |
| "DX: Self Harm"     | E950-E959                                                                                                                                                                                                                      | X71-X83                                                                                                                                                                                                                                                                                                                                                                                                                                                                                                            |
